# Supplementary figures and images for: Lmx1b is required at multiple stages to build expansive serotonergic axon architectures
Source: eLife journal article supplement (doi:10.7554/elife.48788), 2019-07-29

# Figure 8--figure supplement 1

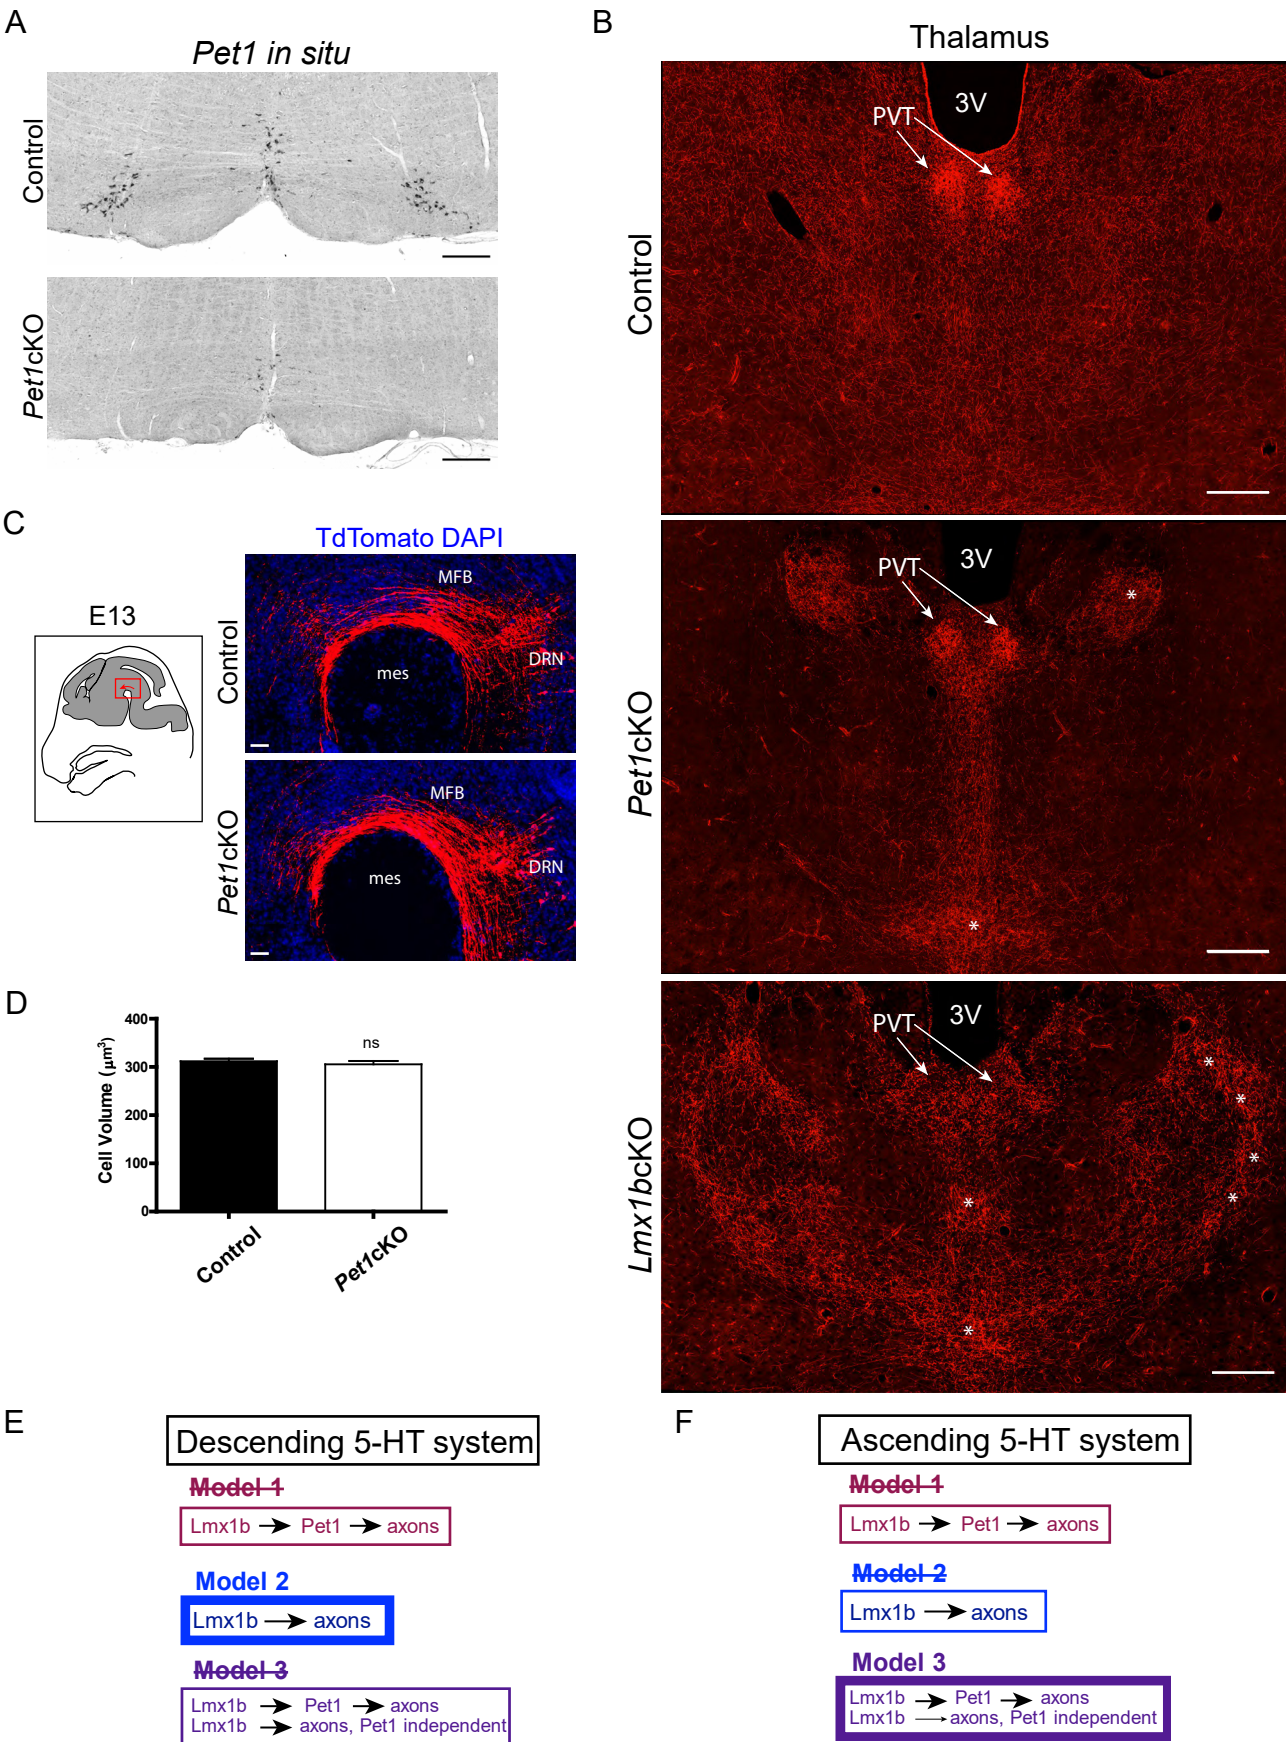

Supplement: supp [file elife-48788-supp-v1.zip]

# Figure 5- figure supplement 1

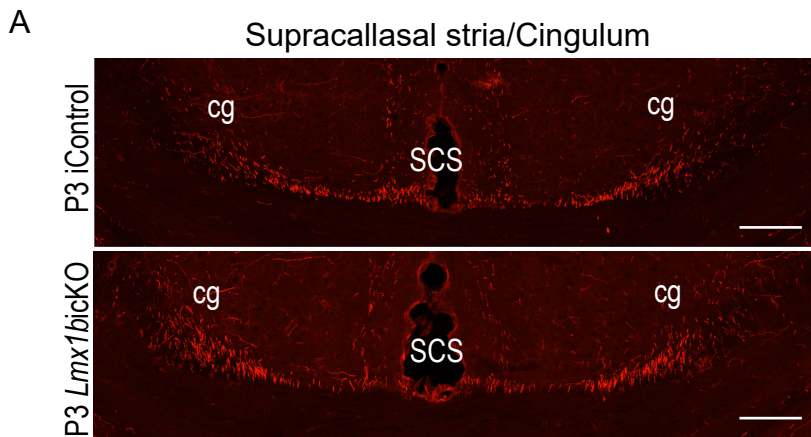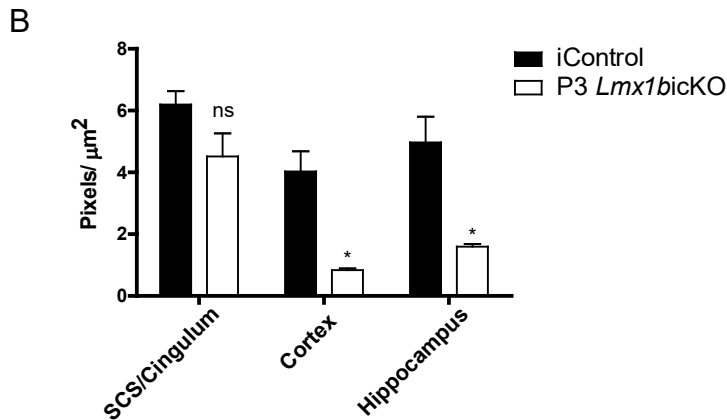

Supplement: supp [file elife-48788-supp-v1.zip]

# Figure 8--figure supplement 2

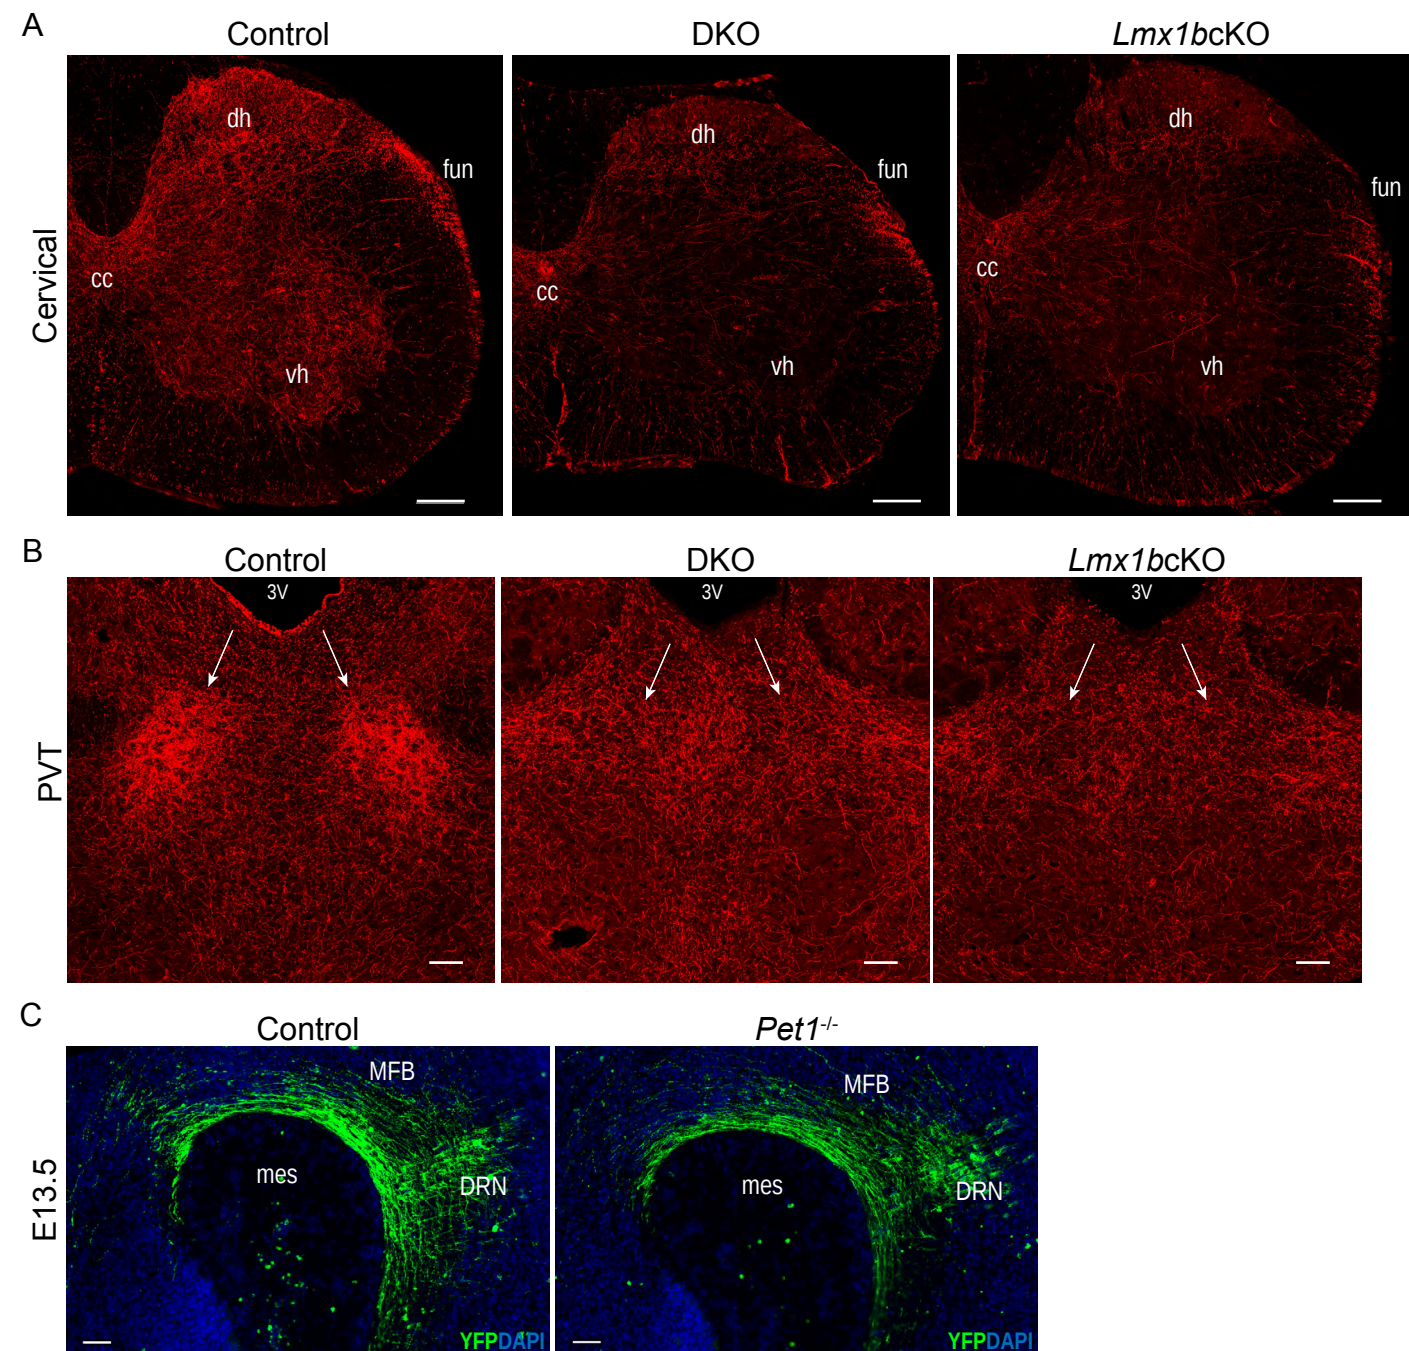

Supplement: supp [file elife-48788-supp-v1.zip]

# Figure 1--figure supplement 1

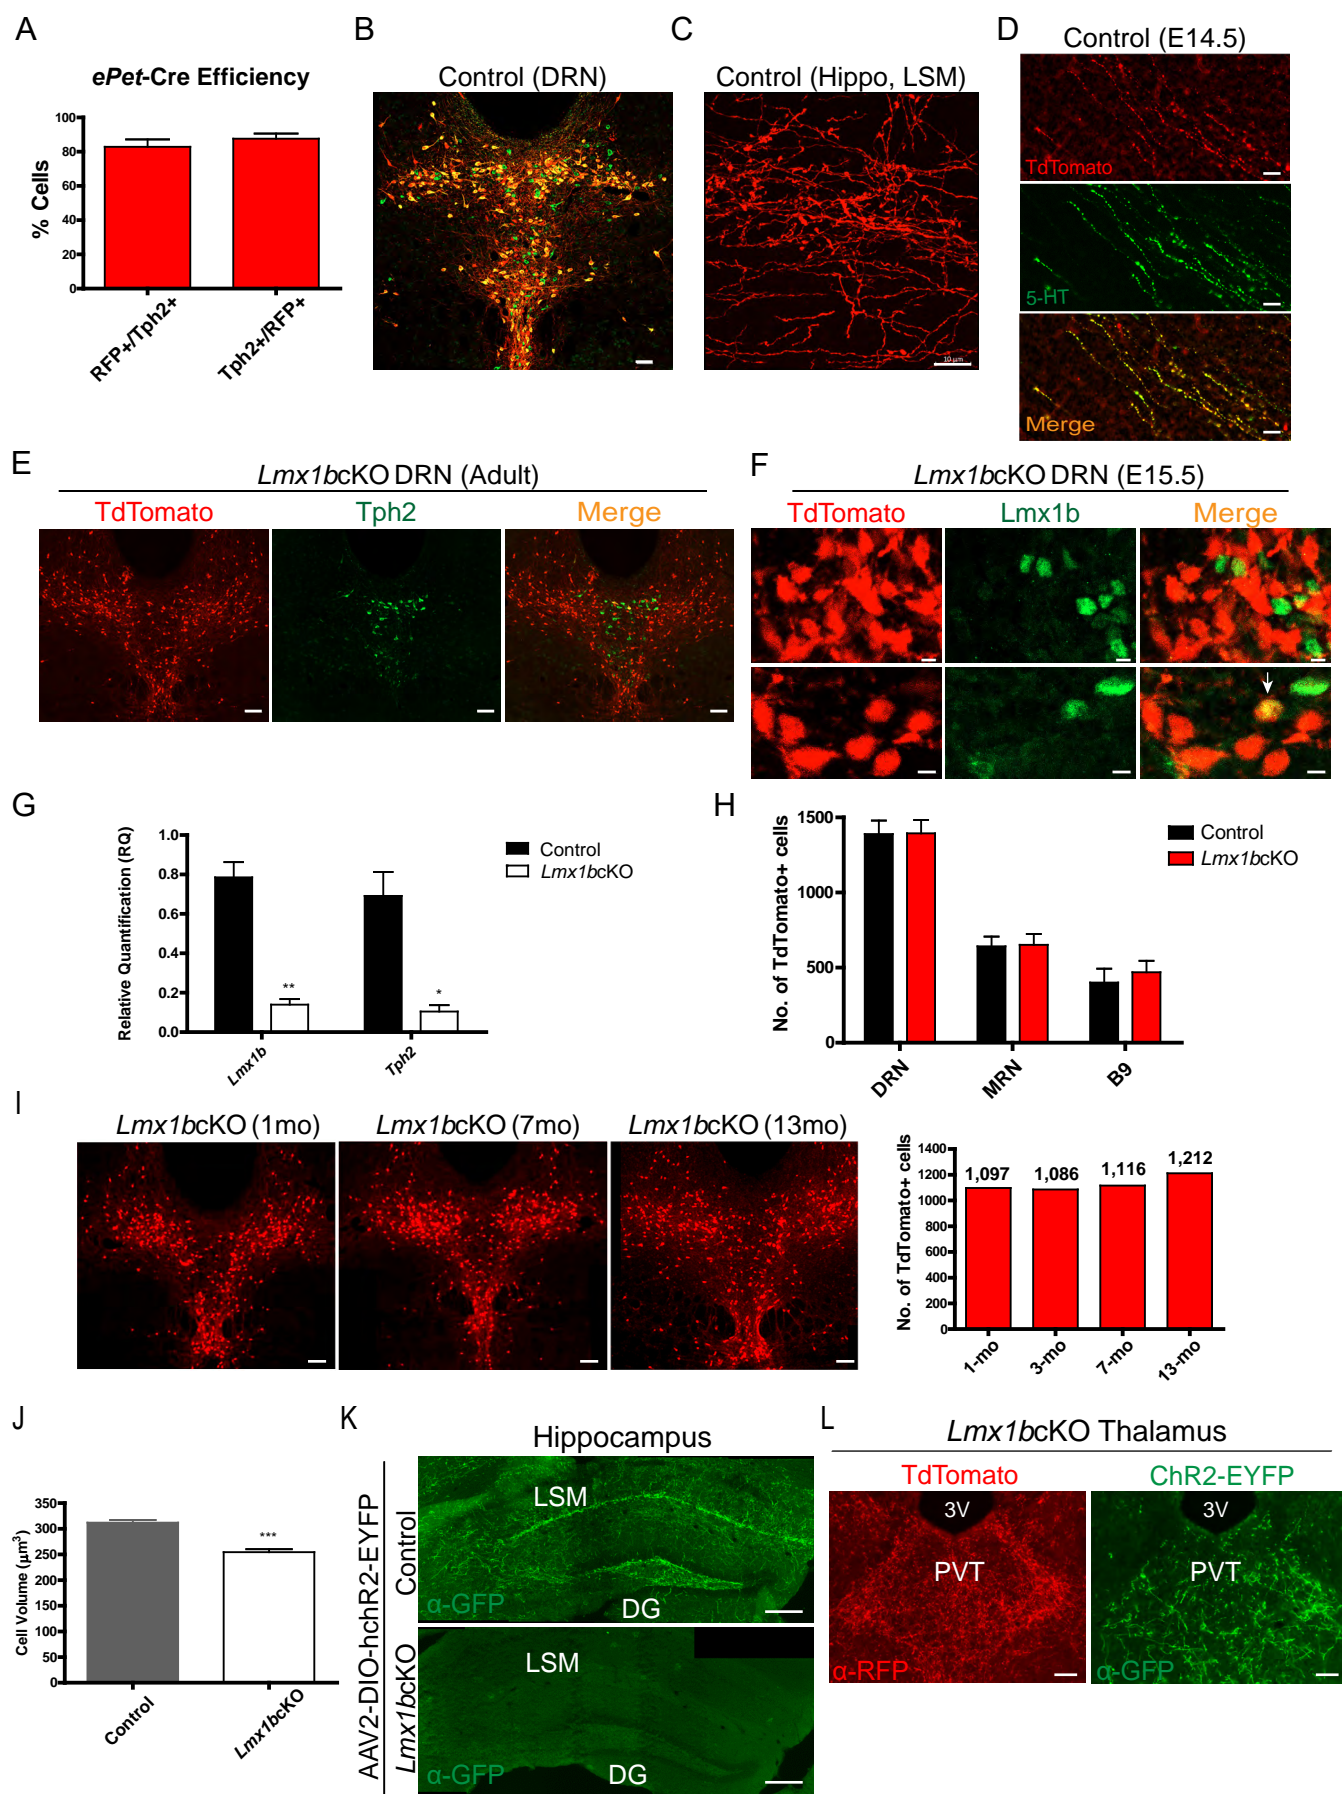

Supplement: supp [file elife-48788-supp-v1.zip]

Figure 1- figure supplement 2

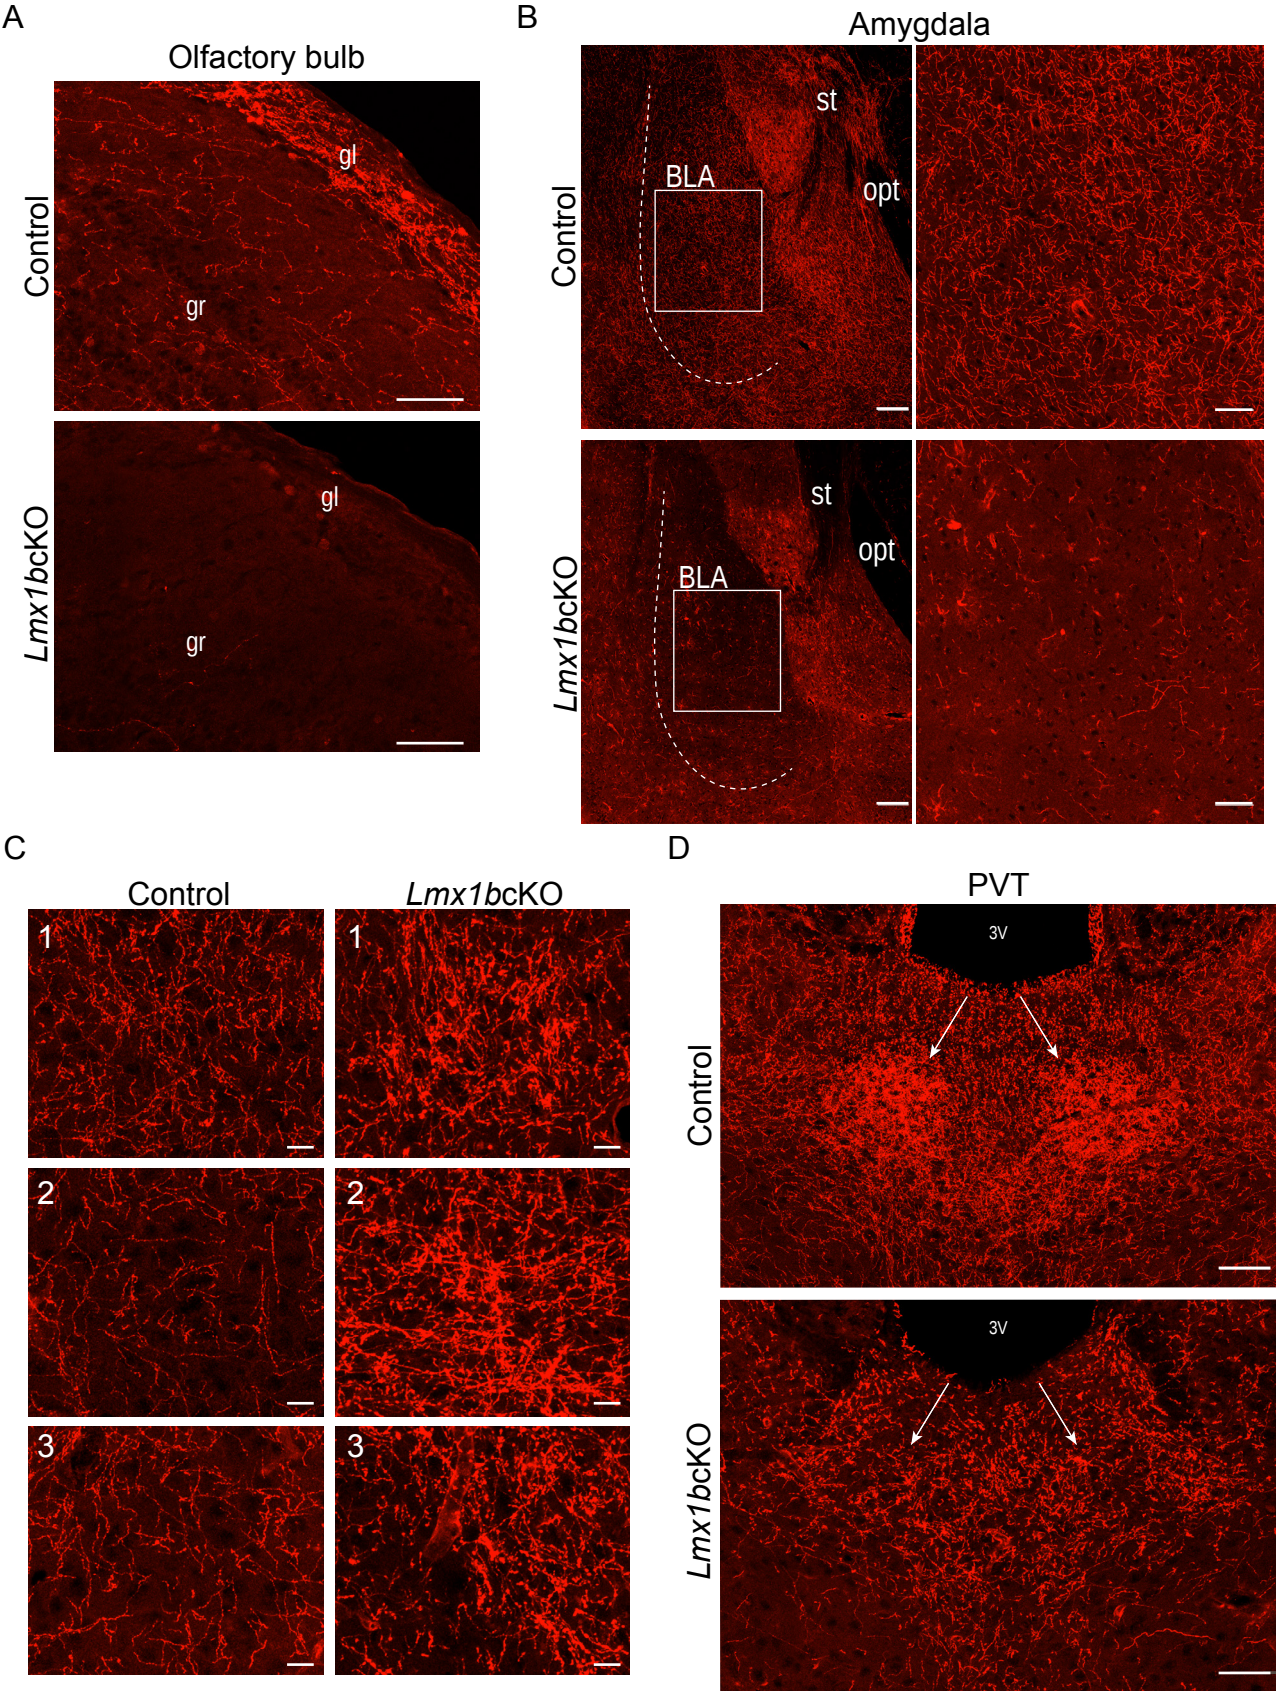

Supplement: supp [file elife-48788-supp-v1.zip]

# Figure 2--figure supplement 1

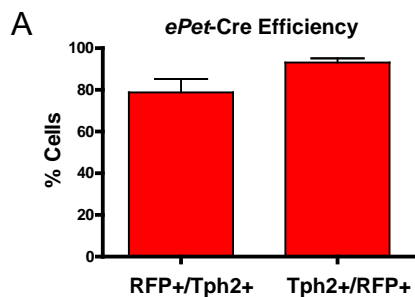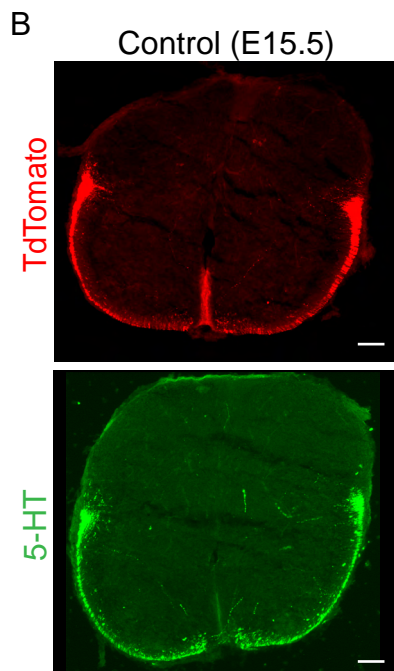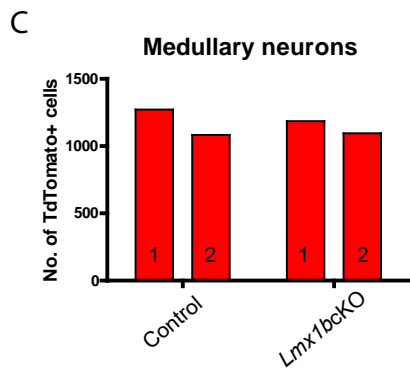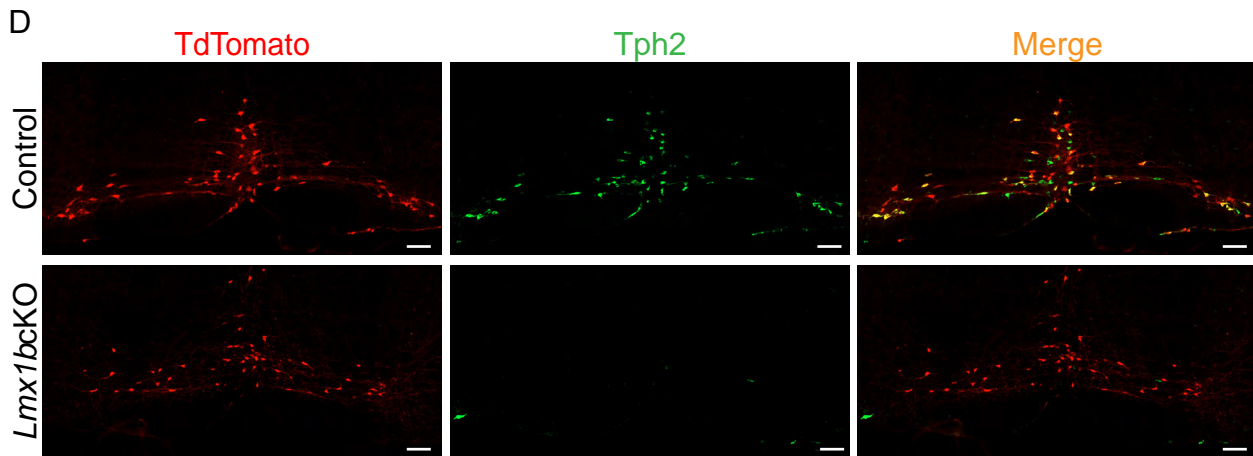

Supplement: supp [file elife-48788-supp-v1.zip]

# Figure 9--figure supplement 1

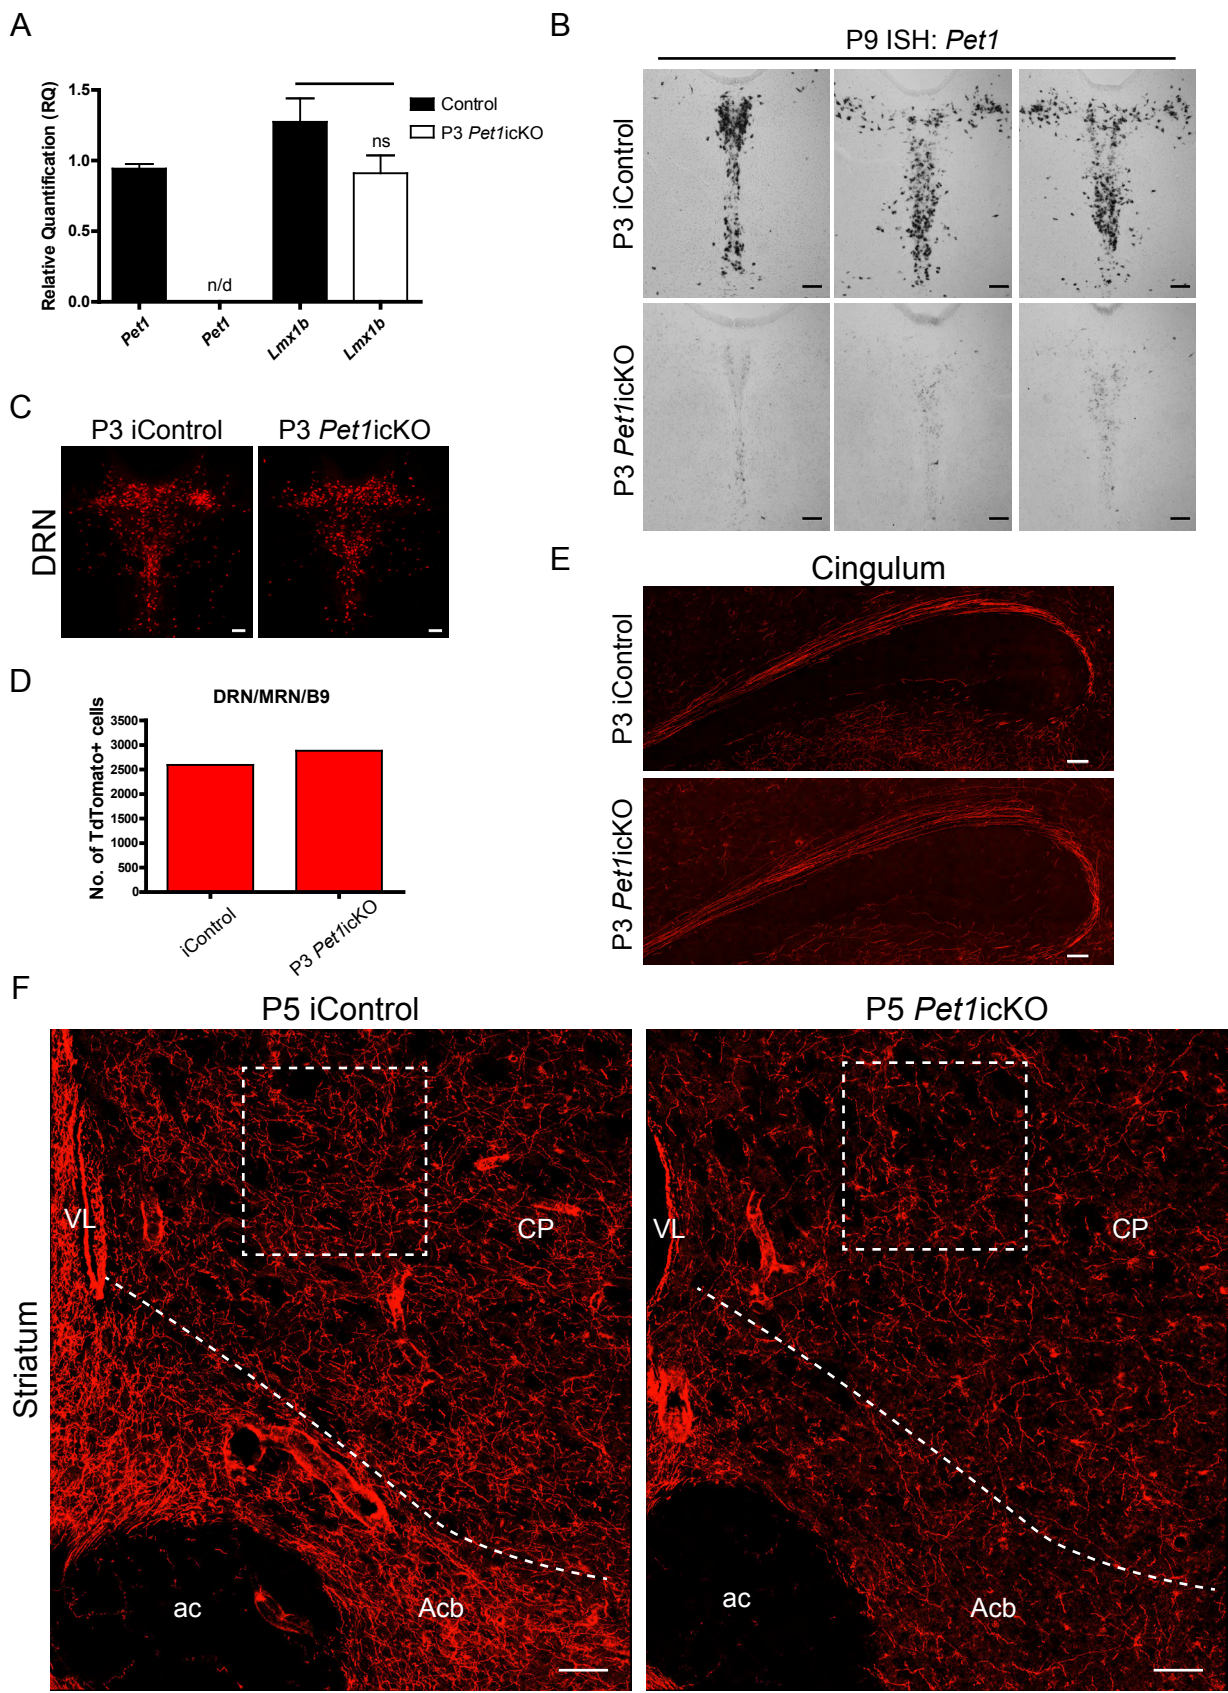

Supplement: supp [file elife-48788-supp-v1.zip]

# Figure 2--figure supplement 2

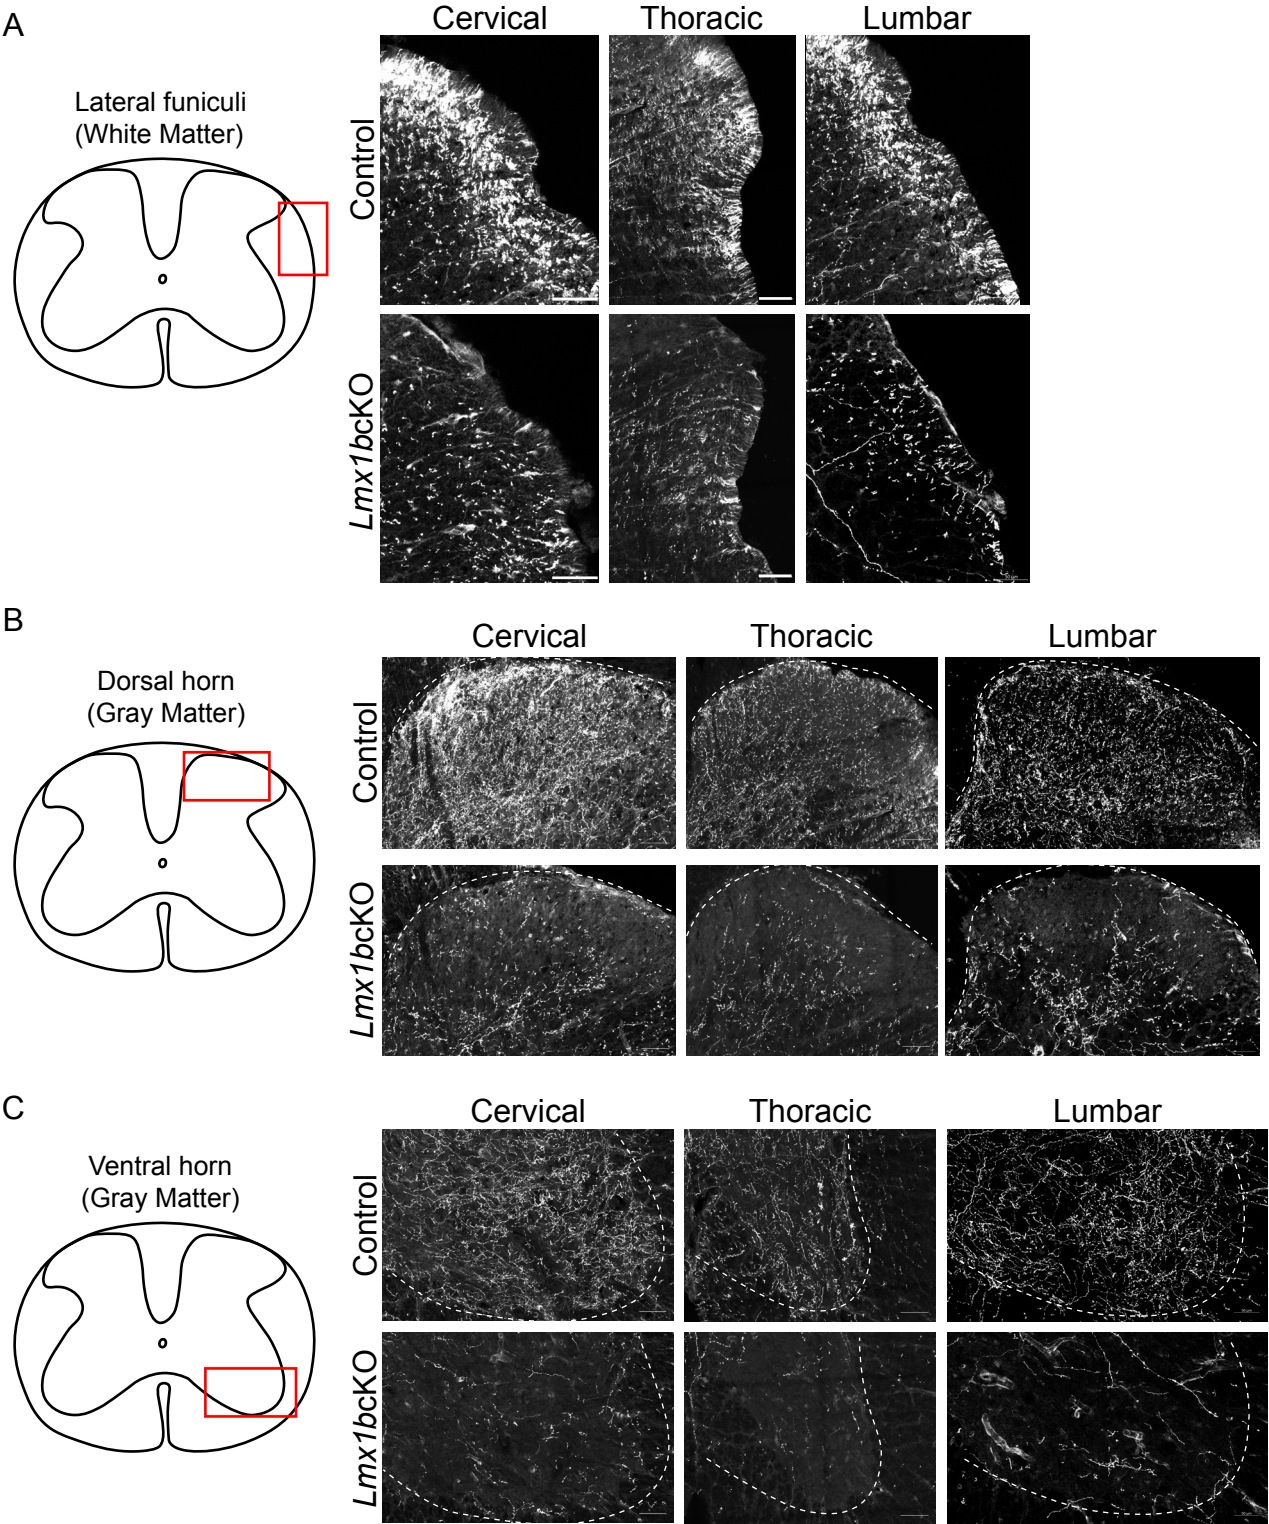

Supplement: supp [file elife-48788-supp-v1.zip]

Figure 4--figure supplement 1

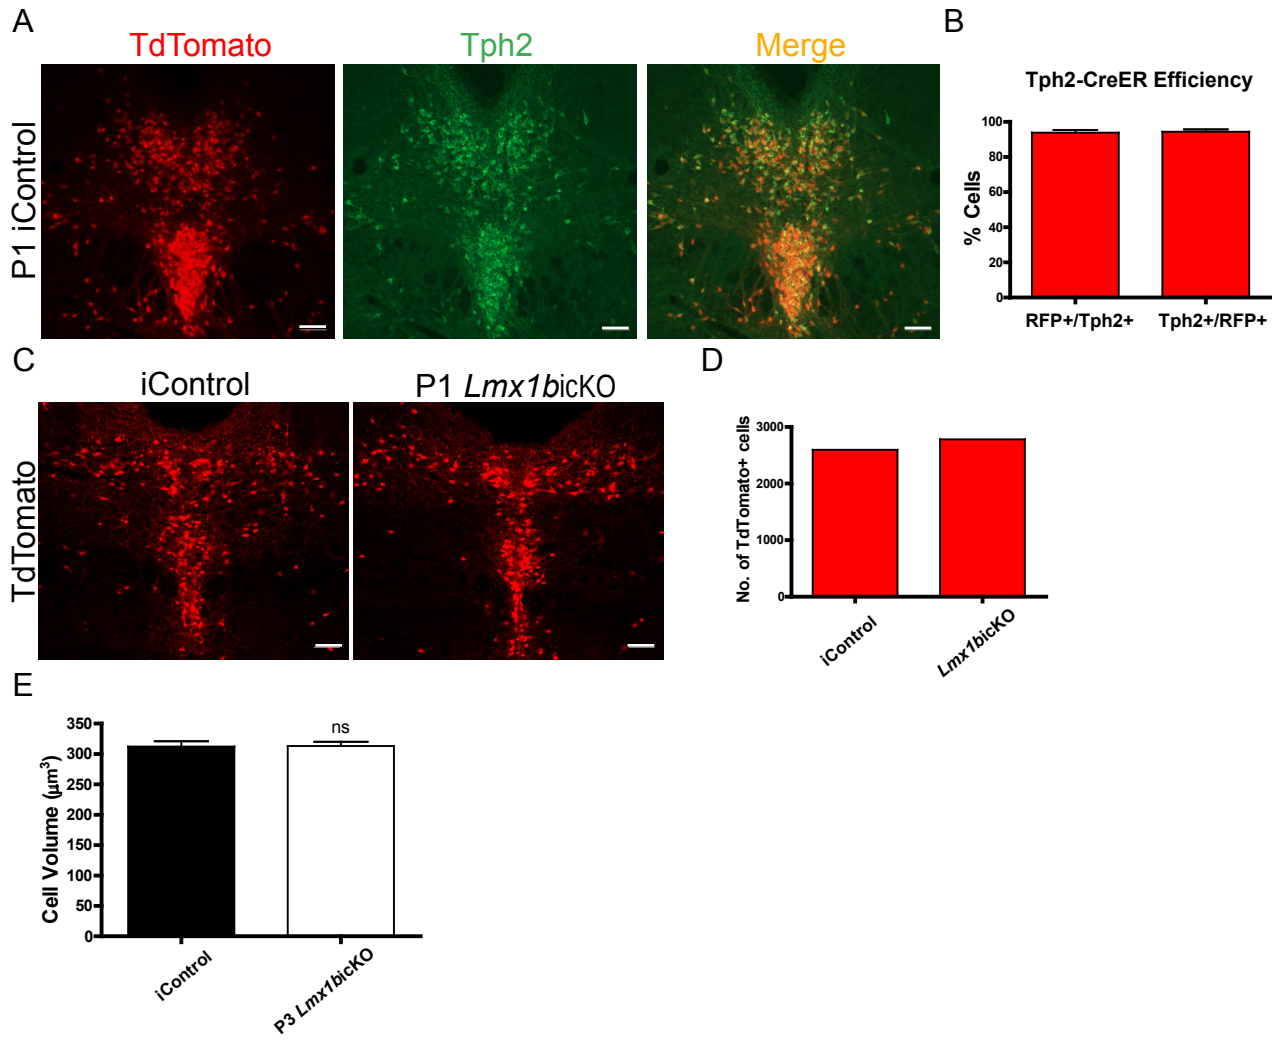

Supplement: supp [file elife-48788-supp-v1.zip]
